# Supplementary material for: A luminescent turn-up metal–organic framework sensor for tryptophan based on singlet–singlet Förster energy transfer
Source: Royal Society of Chemistry journal article supplement (doi:10.1039/c8tb01592a), 2018-01-01
Supplement: c8tb01592a1.pdf [file c8tb01592a1.pdf]

## Supporting Information

### **A luminescent turn-up metal-organic framework sensor for tryptophan based on singlet-singlet Förster energy transfer**

Jun Zhang<sup>®</sup>, Yike Huang<sup>®</sup>, Dan Yue, Yuanjing Cui,\* Yu Yang and Guodong Qian\*

State Key Laboratory of Silicon Materials, Cyrus Tang Center for Sensor Materials  
and Applications, School of Materials Science and Engineering, Zhejiang University,  
Hangzhou 310027, China

\*Corresponding author. Tel.: +86-571-87952229; Fax: +86-571-87951234

E-mail address: cuiyj@zju.edu.cn (Y. Cui), gdqian@zju.edu.cn (G. Qian)

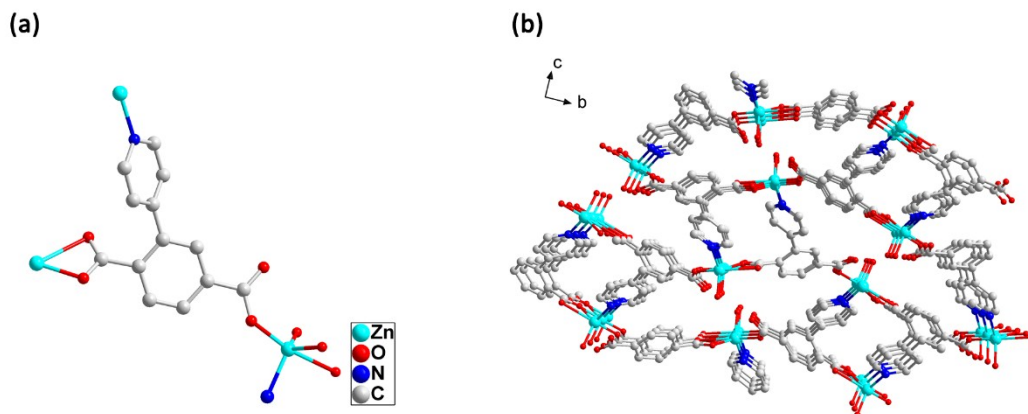

**Figure S1.** (a) The coordination environments of H<sub>2</sub>pta ligand; (b) The 3D packing structure of ZJU-108 along the *a*-axis. The hydrogen atoms are omitted for clarity.

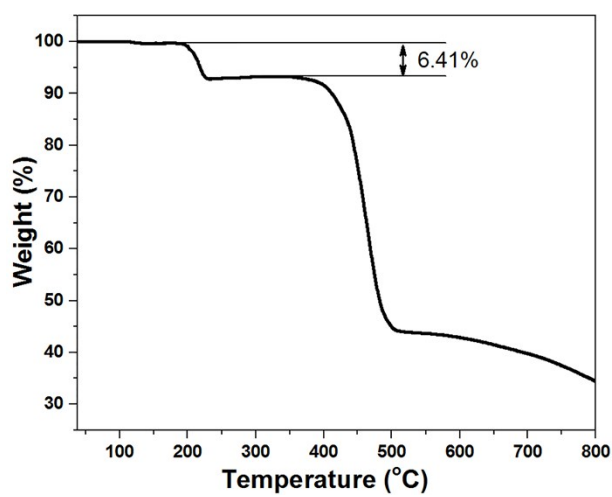

**Figure S2.** TGA curves of ZJU-108.

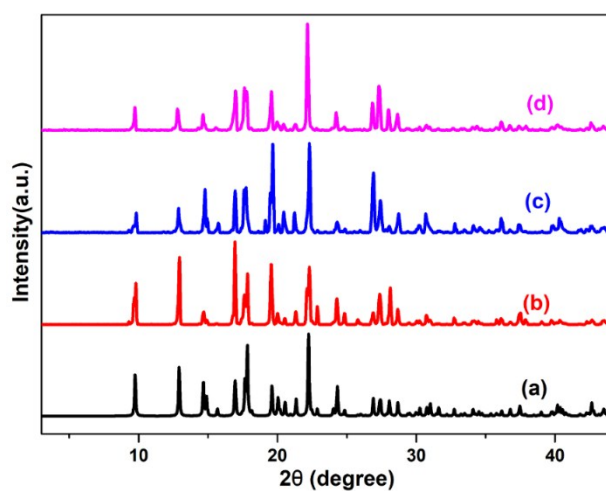

**Figure S3.** The PXRD patterns of (a)sim-ZJU-108; (b)syn-ZJU-108; (c)ZJU-108 in H<sub>2</sub>O for one month; (d)ZJU-108 in tryptophan aqueous solution (0.1 mM) for 3 days.

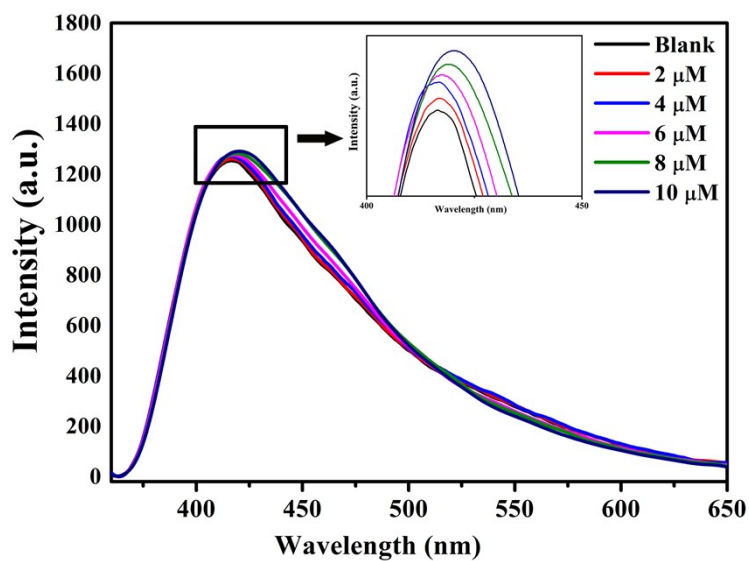

**Figure S4.** Luminescence response of ZJU-108 to different concentration (0-10  $\mu$ M) of tryptophan in aqueous solution.

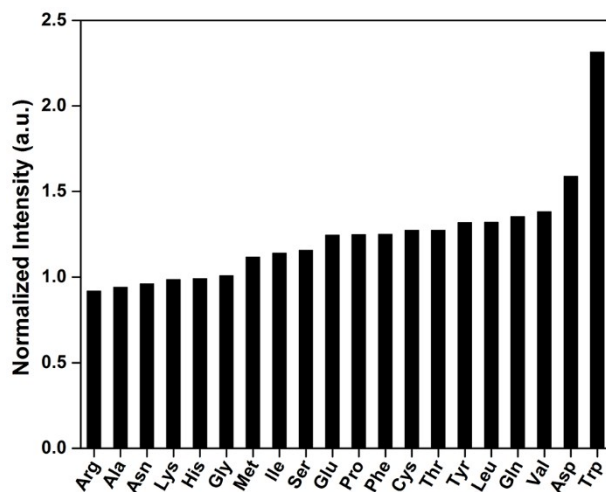

**Figure S5.** Luminescence response of **ZJU-108** to different amino acids (0.5 mM) in aqueous solution. The excitation wavelength is 323 nm.

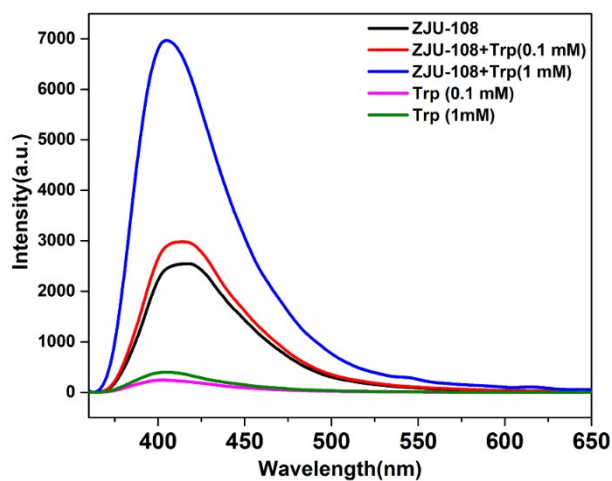

**Figure S6.** The emission spectra of **ZJU-108**, Trp and **ZJU-108-Trp** under the same experiment conditions. The excitation wavelength is 323 nm.

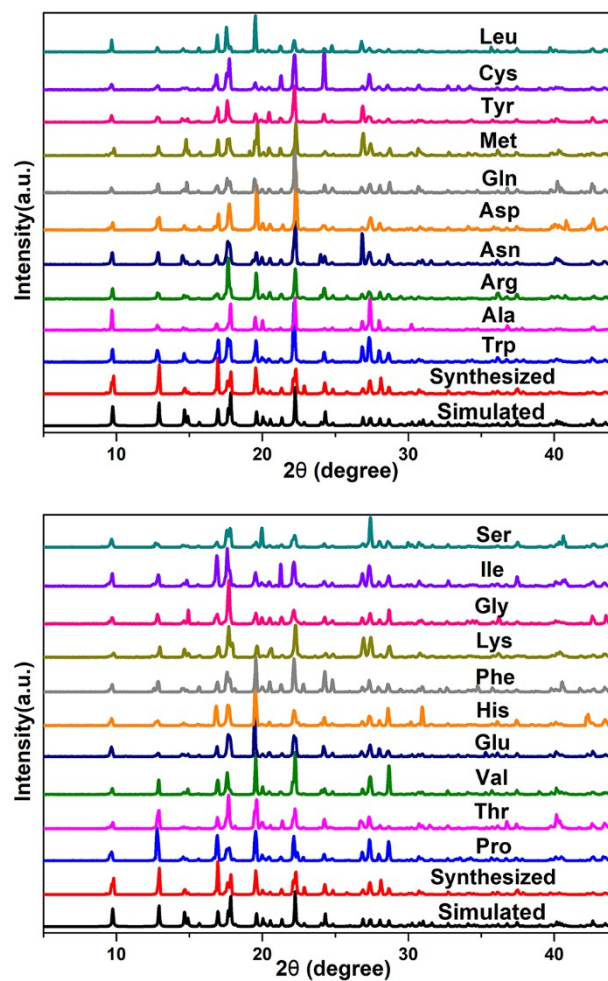

**Figure S7.** The PXRD patterns of **ZJU-108** in aqueous solutions of different amino acids (0.1 mM) for 3 days.

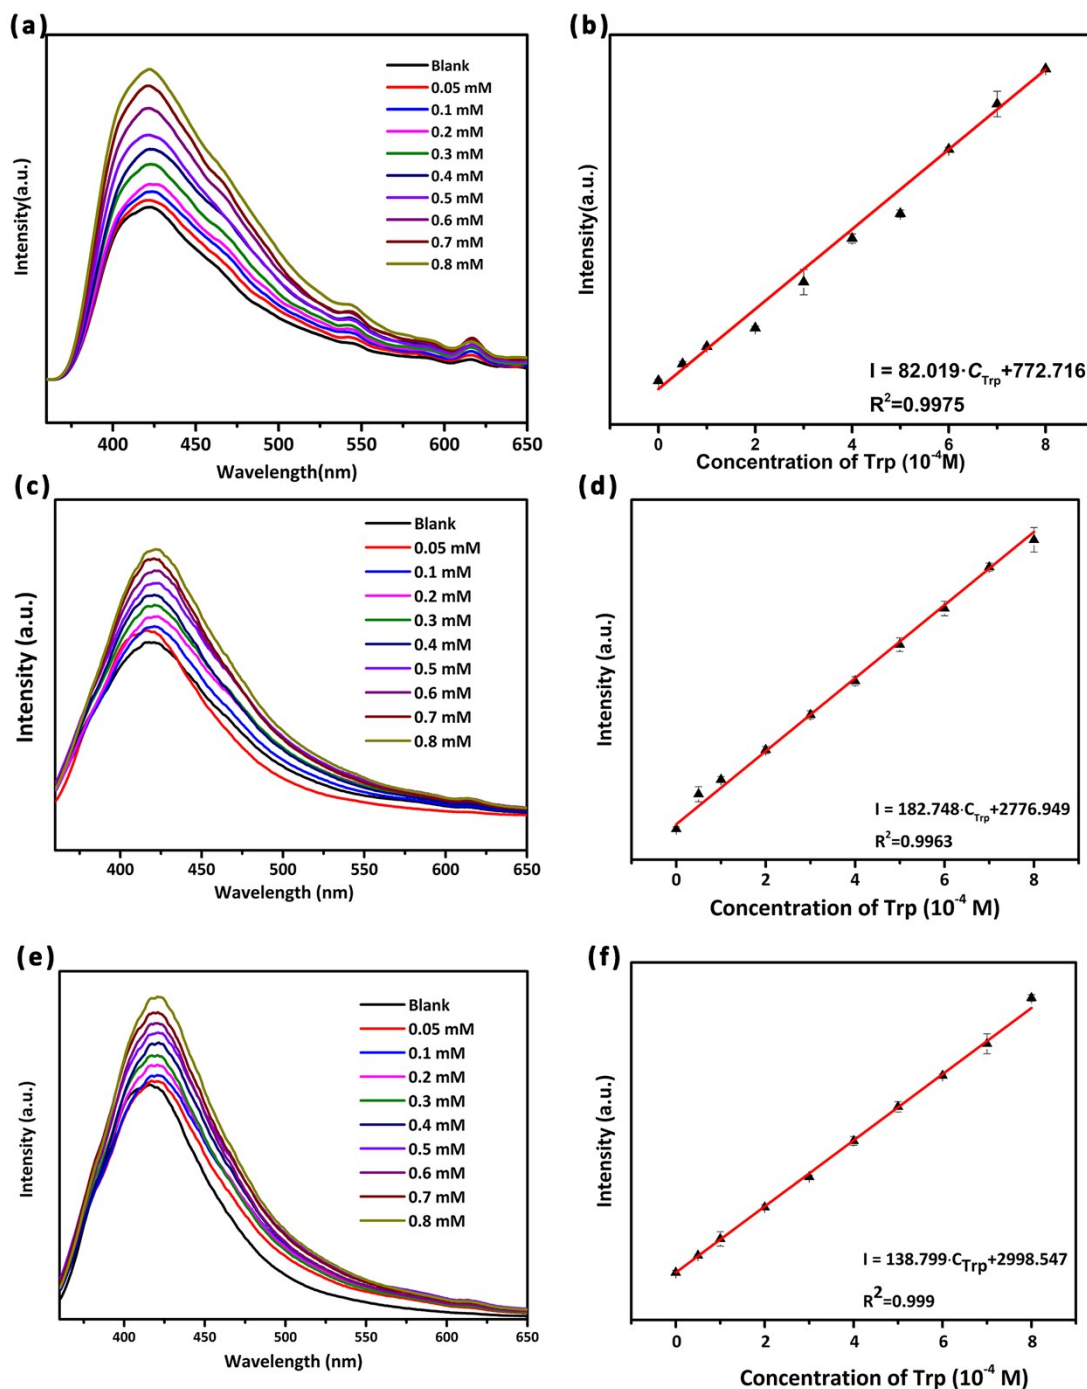

**Figure S8.** (a) Luminescence response of **ZJU-108** to different concentrations of tryptophan in serum; (b) Concentration dependence of the luminescence intensity at 419 nm in serum. (c) Luminescence response of **ZJU-108** to different concentrations of tryptophan in urine; (d) Concentration dependence of the luminescence intensity at 419 nm in urine. (e) Luminescence response of **ZJU-108** to different concentrations of tryptophan in intracellular fluid; (f) Concentration dependence of the luminescence intensity at 419 nm intracellular fluid. All luminescence experiments were tested in triplicate and the excitation wavelength is 323 nm.

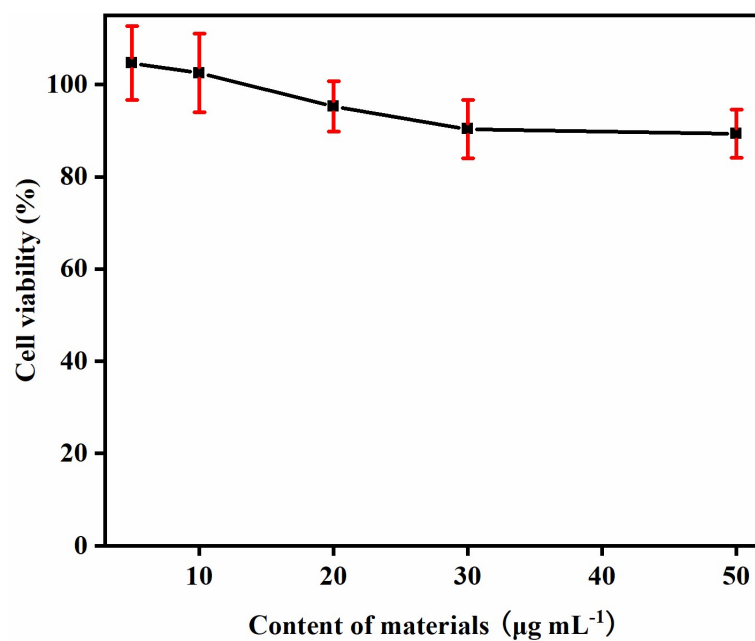

**Figure S9.** MTT assay of ZJU-108 obtained from incubation with PC12 Cells

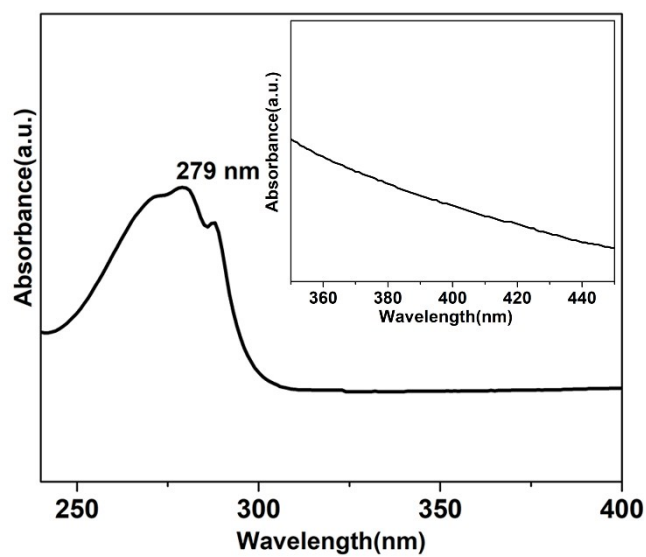

**Figure S10.** The UV-vis absorption spectrum for Trp, inset: Enlarged spectrum between 350 nm to 450 nm.

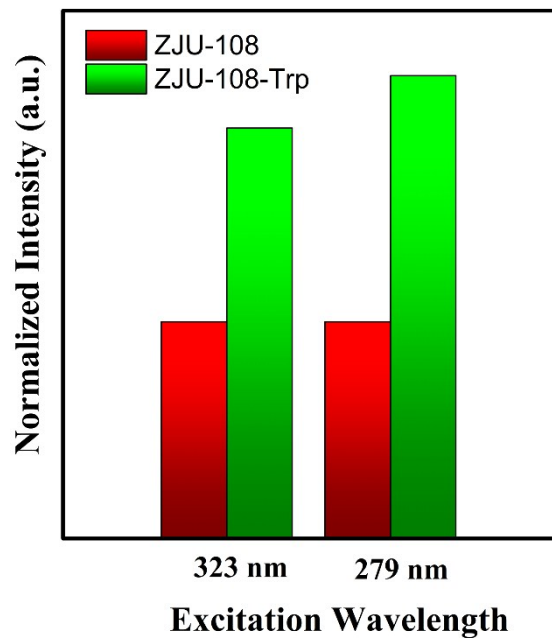

**Figure S11.** The normalized emission intensity of **ZJU-108** and **ZJU-108-Trp** upon the excitation of 323 and 279 nm.



**Table S1.** Crystallographic data collection and refinement details for **ZJU-108**.

| <b>ZJU-108</b>                                                                                   |                                                   |
|--------------------------------------------------------------------------------------------------|---------------------------------------------------|
| Empirical formula                                                                                | C <sub>13</sub> H <sub>8</sub> NO <sub>5</sub> Zn |
| Formula weight                                                                                   | 323.57                                            |
| Temperature/K                                                                                    | 293(2)                                            |
| Wavelength/Å                                                                                     | 0.71073                                           |
| Crystal system                                                                                   | Monoclinic                                        |
| Space group                                                                                      | P2(1)/n                                           |
| a/Å                                                                                              | 6.4995(2)                                         |
| b/Å                                                                                              | 18.1405(5)                                        |
| c/Å                                                                                              | 10.6050(3)                                        |
| α/°                                                                                              | 90                                                |
| β/°                                                                                              | 100.155(2)                                        |
| γ/°                                                                                              | 90                                                |
| Z                                                                                                | 4                                                 |
| Density (calculated g cm <sup>-3</sup> )                                                         | 1.7461                                            |
| Absorption coefficient/ mm <sup>-1</sup>                                                         | 2.012                                             |
| Reflections collected                                                                            | 25915                                             |
| Independent reflections                                                                          | 2146 [R(int) = 0.0237]                            |
| F(000)                                                                                           | 652                                               |
| Goodness of fit on F <sup>2</sup>                                                                | 1.212                                             |
| R1,wR2(I>2σ(I))a                                                                                 | 0.0359, 0.1340                                    |
| R1,wR2(all data)a                                                                                | 0.0412, 0.1387                                    |
| aR1=Σ( Fo - Fc )/Σ Fo ;<br>wR2=[Σw( Fo - Fc  <sup>2</sup> )/ΣwFo <sup>2</sup> ] <sup>1/2</sup> . |                                                   |

The structure was determined by direct methods, and refined by the full-matrix least-square method with the SHELX-2013 program package. The data sets were corrected by empirical absorption correction using spherical harmonics, implemented in the SCALE3 ABSPACK scaling algorithm. All non-hydrogen atoms were refined with anisotropic thermal parameters, and all H atoms on C atoms were generated geometrically and refined with isotropic thermal parameters.

**Table S2.** The ICP data for Zn<sup>2+</sup> ions in different samples.

| Samples                       | Concentration of Zn <sup>2+</sup> ion (ppm) |
|-------------------------------|---------------------------------------------|
| <b>ZJU-108-H<sub>2</sub>O</b> | 2.76                                        |
| <b>ZJU-108-pH1.8</b>          | 35.94                                       |
| <b>ZJU-108-pH3.1</b>          | 9.25                                        |
| <b>ZJU-108-pH6.5</b>          | 7.64                                        |
| <b>ZJU-108-pH9.4</b>          | 6.39                                        |
| <b>ZJU-108-pH11.7</b>         | 4.04                                        |

The **ZJU-108-H<sub>2</sub>O** was obtained by immersing **ZJU-108** in water for 12 hours and tested the amount of Zn<sup>2+</sup> ions in the soaking solution. Same tests go for the samples of **ZJU-108** in aqueous solution with pH=1.8-11.7.

**Table S3.** Calculation results of singlet state energy level and the corresponding wavelength of excitation light of H<sub>2</sub>pta and selected amino acids.

| Amino acids             | Singlet state energy level (eV) | Excitation light wavelength (nm) |
|-------------------------|---------------------------------|----------------------------------|
| <b>H<sub>2</sub>pta</b> | <b>3.8009</b>                   | <b>326.20</b>                    |
| Alanine                 | 5.2382                          | 236.69                           |
| Arginine                | 5.2456                          | 236.36                           |
| Asparagine              | 5.1484                          | 240.82                           |
| Aspartic Acid           | 5.2749                          | 235.04                           |
| Cysteine                | 5.1767                          | 239.50                           |
| Glutamine               | 5.3442                          | 232.00                           |
| Glutamic Acid           | 5.3536                          | 231.59                           |
| Glycine                 | 5.4098                          | 229.19                           |
| Histidine               | 4.6439                          | 266.98                           |
| Isoleucine              | 5.3979                          | 229.69                           |
| Leucine                 | 5.2784                          | 234.89                           |
| Lysine                  | 5.4104                          | 229.16                           |
| Methionine              | 5.3779                          | 230.54                           |
| Phenylalanine           | 4.9072                          | 252.66                           |
| Proline                 | 5.1332                          | 241.54                           |
| Serine                  | 5.2474                          | 236.28                           |
| Threonine               | 5.2171                          | 237.65                           |
| <b>L-Tryptophan</b>     | <b>4.3051</b>                   | <b>287.99</b>                    |
| D-Tryptophan            | 4.3527                          | 284.84                           |
| Tyrosine                | 4.8780                          | 254.17                           |
| Valine                  | 5.3902                          | 230.02                           |

The calculation of the amino acids and the ligand were performed using the Gaussian 09 program. All the structures were completely optimized to the ground state by the DFT method at B3LYP/6+g(d,p) level. Then the singlet and triplet energy of structures were calculated based on TD-SCF method.
